# Sensitivity to sequential regularities in risky decision making

Andrea Kóbor<sup>1</sup>, Ádám Takács<sup>2,3</sup>, Karolina Janacsek<sup>3,4</sup>, Zsófia Kardos<sup>5,6</sup>, Valéria Csépe<sup>1,6</sup>, Dezso Nemeth<sup>3,4\*</sup>

<sup>1</sup>Brain Imaging Centre, Research Centre for Natural Sciences, Hungarian Academy of Sciences, Budapest, Hungary

<sup>2</sup>Institute of Neuroscience and Psychology, University of Glasgow, Glasgow, UK

<sup>3</sup>Institute of Psychology, Eötvös Loránd University, Budapest, Hungary

<sup>4</sup>MTA-ELTE NAP B Brain, Memory and Language Research Group, Institute of Cognitive Neuroscience and Psychology, Research Centre for Natural Sciences, Hungarian Academy of Sciences, Budapest, Hungary

<sup>5</sup>Institute of Cognitive Neuroscience and Psychology, Research Centre for Natural Sciences, Hungarian Academy of Sciences, Budapest, Hungary

<sup>6</sup>Department of Cognitive Science, Budapest University of Technology and Economics, Budapest, Hungary

## \*Correspondence:

Dezso Nemeth

E-mail: [nemeth@nemethlab.com](mailto:nemeth@nemethlab.com)

**Keywords: Balloon Analogue Risk Task (BART), decision making, hierarchical cluster analysis, implicit learning, sequence learning**

## Decision making and sequence learning

### 25 **Abstract**

26 Probabilistic sequence learning involves a set of robust mechanisms that enable the extraction  
27 of statistical patterns embedded in the environment. It contributes to different perceptual and  
28 cognitive processes as well as to effective behavior adaptation, which is a crucial aspect of  
29 decision making. Although previous research attempted to model reinforcement learning and  
30 reward sensitivity in different risky decision-making paradigms, the basic mechanism of the  
31 sensitivity to statistical regularities has not been anchored to external tasks. Therefore, the  
32 present study aimed to investigate the statistical learning mechanism underlying individual  
33 differences in risky decision making. To reach this goal, we tested whether implicit  
34 probabilistic sequence learning and risky decision making share common variance. To have a  
35 more complex characterization of individual differences in risky decision making, hierarchical  
36 cluster analysis was conducted on performance data obtained in the Balloon Analogue Risk  
37 Task (BART) in a large sample of healthy young adults. Implicit probabilistic sequence  
38 learning was measured by the Alternating Serial Reaction Time (ASRT) task. According to  
39 the results, a four-cluster structure was identified involving average risk-taking, slowly  
40 responding, risk-taker, and risk-averse groups of participants, respectively. While the entire  
41 sample showed significant learning on the ASRT task, we found greater sensitivity to  
42 statistical regularities in the risk-taker and risk-averse groups than in participants with average  
43 risk-taking. These findings revealed common mechanisms in risky decision making and  
44 implicit probabilistic sequence learning and an adaptive aspect of higher risk taking on the  
45 BART. Our results could help to clarify the neurocognitive complexity of decision making  
46 and its individual differences.

47

## Decision making and sequence learning

### 48 **1. Introduction**

49 Decisions about skill-based actions are usually automatic in our daily routine, for instance,  
50 while we drive a car, do sports, or navigate in the operating system of our laptops. Making  
51 risky decisions, such as having one more drink before driving or driving a car beyond a speed  
52 limit, also involves automatic processes and gut feelings. We assume that decisions on both  
53 skill-based actions and risky situations necessitate the sensitivity to sequential or statistical  
54 regularities. An increased sensitivity to environmental regularities, which is also referred to as  
55 probabilistic sequence learning or statistical learning, has been shown to be crucial in healthy  
56 daily functioning, because it contributes to the acquisition of perceptual, motor, and cognitive  
57 skills, and to effective behavior adaptation (Batterink, Reber, Neville, & Paller, 2015;  
58 Chaudhuri & Fiete, 2016; Nemeth, Janacsek, & Fiser, 2013). Although probabilistic sequence  
59 learning and risky decision making could be connected, the majority of studies on risk-related  
60 behavior has focused on the effect of reward contingencies, task structure, different  
61 personality traits and/or clinical symptoms (e.g., Bornovalova et al., 2009; Brand, Labudda, &  
62 Markowitsch, 2006; Fein & Chang, 2008; Schiebener, Wegmann, Pawlikowski, & Brand,  
63 2012), and the direct investigation of the association between this learning mechanism and  
64 risk-related behavior has been missing from the field. Learning per se has been linked to the  
65 adaptive nature of risk-related behavior (Bechara, Damasio, Tranel, & Damasio, 2005; Euser  
66 et al., 2013), but the involvement of the ability to acquire statistical contingencies has been  
67 unclear. Here we aim to fill in this gap by analyzing task-solving strategies during a  
68 sequential risk-taking task with probabilistic underlying structure in a large population-based  
69 sample and testing its relations to probabilistic sequence learning measured by an independent  
70 perceptual-motor four-choice reaction time task that involves implicit learning of statistical  
71 regularities.

72  
73 The Balloon Analogue Risk Task (BART) has been considered as a valid measure of  
74 naturalistic risk-taking behavior by modeling the day-to-day sequential processing of risk  
75 (Helfinstein et al., 2014; Lejuez et al., 2002; Schonberg et al., 2012; Schonberg, Fox, &  
76 Poldrack, 2011). In this task, participants are asked to inflate an empty virtual balloon. Each  
77 balloon pump is associated with either a reward or a balloon burst. The probability of a  
78 balloon burst increases with each successive pump, but the regularity that determines balloon  
79 bursts following a pump is unknown to participants. In previous experiments, probabilities of  
80 balloon bursts have usually been chosen from a uniform distribution, and participants have  
81 had to infer these probabilities by trial and error learning (Schonberg et al., 2011). As the  
82 appearance of gains (balloon increase) and losses (balloon burst) follows a probabilistic  
83 structure, expectations about stimulus-response contingencies might not be established on the  
84 basis of purely explicit task-solving strategies.

85  
86 Previous results also suggest that the sequential processing of risk in the BART evokes  
87 expectations about outcome contingencies (Kardos et al., 2016; Kiat, Straley, & Cheadle,  
88 2016), and the process of expectation formation is a crucial element of probabilistic sequence  
89 learning, as well. According to this argument, the BART might share common variance with  
90 other external measures of probabilistic sequence learning. This assumption also follows from  
91 another line of research suggesting interactions between different learning/memory systems  
92 (for a review, see Robertson, 2012) and learning transfer between learning/memory tasks  
93 (Mosha & Robertson, 2016). However, it has also been shown that multiple task-related  
94 sequential regularities could be acquired in parallel (Goschke & Bolte, 2012), based on which  
95 the lack of relation between learning two different dimensions of sequences (i.e., the sequence  
96 of spatial positions in the perceptual-motor task and the sequence of response-outcome  
97 probabilities in the BART) is also possible.

## Decision making and sequence learning

98 As the BART is a widely used tool in the clinical and experimental literature (Lauriola,  
99 Panno, Levin, & Lejuez, 2014), previous work has already attempted to go beyond the  
100 common behavioral variables to describe performance and thus capture more processes of  
101 task solving. Schmitz, Manske, Preckel, and Wilhelm (2016) differentiated variables related  
102 to risk taking, task performance, impulsive decision making, and reinforcement sequence  
103 modulation. Using a shortened version of the BART, on the basis of two empirical studies on  
104 adolescents and young adults (among whom a significant proportion showed deviant  
105 behavior), the authors suggested that the number of balloon bursts was the most consistent  
106 correlate of risk taking with a high predictive validity, and the use of RT-based scores  
107 indicating impulsive decision making was limited.

108  
109 With the same purpose, to more clearly characterize the underlying psychological/cognitive  
110 processes determining BART performance, another line of research has focused on  
111 developing formal models of task. Wallsten, Pleskac, and Lejuez (2005) compared alternative  
112 models of the BART and found that a four-parameter model provided the best fit to data. This  
113 model indicated that the decision makers assumed stationary burst probabilities over pumps,  
114 they learned – updated their opinion about burst probabilities – in a Bayesian fashion over  
115 balloon trials, their initial risk preferences were evaluated prior to responding, and their  
116 response consistency remained constant over trials. The study of Pleskac, Wallsten, Wang,  
117 and Lejuez (2008) added to these findings by providing evidence that decision makers  
118 adapted their mental representation and learning processes according to the actual stochastic  
119 structure of the decision task when a modified version of the BART was applied. It was also  
120 suggested that the ill-defined, nonstationary characteristic of the original task, which was  
121 related to learning processes, hindered its predictive validity to identify real-world risk taking  
122 behavior. Meanwhile, on data derived from a BART version with fixed bursting probability  
123 over trials, van Ravenzwaaij, Dutilh, and Wagenmakers (2011) found that a simplified, two-  
124 parameter (risk taking and response consistency) version of the model introduced by Wallsten  
125 et al. (2005) showed adequate parameter recovery instead of the four-parameter model.

126  
127 The advantage of cognitive modeling over analyzing the standard behavioral variables of the  
128 BART has been shown, for instance, in the study of Rolison, Hanoch, and Wood (2012),  
129 where no difference was found between younger and older adults in risky behavior according  
130 to the standard BART score, but modeling results revealed that older adults were initially  
131 more risk averse and then adjusted their behavior according to experience. Similarly,  
132 differences in those psychological processes that model parameters represent were found in  
133 the study of Wichary, Pachur, Kościelniak, Rydzewska, and Sedek (2017) between young and  
134 older adults experiencing initial good and bad luck in the BART (see also Koscielniak,  
135 Rydzewska, & Sedek, 2016). In addition, Wichary, Pachur, and Li (2015) revealed striking  
136 gender differences in model parameters between individuals with excessive risk taking  
137 (prisoners) and control participants.

138  
139 Although using other analytic approaches, learning in the BART has also been quantified by  
140 tracking how participants increase the number of balloon pumps after they have gained some  
141 experience with the task during earlier balloon trials (Campbell, Samartgis, & Crowe, 2013;  
142 Euser et al., 2013; Euser, van Meel, Snelleman, & Franken, 2011; Fecteau et al., 2007;  
143 Koscielniak et al., 2016; Lim, Yuen, & Tong, 2015; Vigil-Colet, 2007), and how they change  
144 their behavior on a particular trial according to the outcome on the preceding trial (Courtney  
145 et al., 2012; Kohno et al., 2015). In addition, an increasing number of studies has focused on  
146 how response time of participants could indicate the change of decision-making processes  
147 throughout the BART (e.g., Euser et al., 2011; Hassall, Holland, & Krigolson, 2013; Pleskac

## Decision making and sequence learning

148 & Wershba, 2014; Schonberg et al., 2012). These studies quantified different decision  
149 making mechanisms within the BART; however, these mechanisms have not been assigned to  
150 external measures of implicit acquisition of statistical regularities that could characterize  
151 sequential decision making.

152

153 While the above-mentioned studies have been promising in understanding the cognitive  
154 processes underlying the BART, it is not clear whether the *combination* of basic behavioral  
155 indices might describe distinctive task-solving profiles, which could further promote the  
156 investigation of individual differences in risky decision making. Specifically, more accurate  
157 task-solving profiles could contribute to revealing the exact relationship between probabilistic  
158 sequence learning and BART performance, which otherwise would have remained hidden.  
159 For a better characterization of individual differences in risky decision making, classification  
160 of participants on the basis of their behavioral performance using different clustering methods  
161 seems to be an advantageous approach (Bergman, Magnusson, & El-Khoury, 2003; Kóbor,  
162 Takács, Urbán, & Csépe, 2012). Therefore, in this study, we performed hierarchical cluster  
163 analysis to capture individual differences in BART performance. In two steps, we tested  
164 whether the BART and an implicit probabilistic sequence learning task share common  
165 variance as both tasks involve probabilistic underlying structure. First, we checked the  
166 potential associations between the component measures of the BART and probabilistic  
167 sequence learning. Second, the sequence learning performance of the clusters of participants  
168 with different task-solving strategies were compared.

169

## 170 2. Material and Methods

171

### 172 2.1 Participants

173 The sample consisted of 180 healthy young adults. Mainly the undergraduate students of  
174 Eötvös Loránd University participated in this study. Descriptive characteristics of the sample  
175 are presented in Table 1 (see the column labeled as “Total sample”). All participants had  
176 normal or corrected-to-normal vision and none of them reported a history of any neurological  
177 and/or psychiatric condition. All participants provided written informed consent before  
178 enrolment and received course credits for taking part in the experiment. The study was  
179 approved by the United Ethical Review Committee for Research in Psychology (EPKEB) in  
180 Hungary (approval number: 30/2012). The study was conducted in accordance with the  
181 Declaration of Helsinki.

182

PLEASE INSERT TABLE 1 HERE

183

### 184 2.2 Tasks

185

#### 186 2.2.1 BART

187 The general structure and appearance of the BART was the same as described in previous  
188 studies (Fein & Chang, 2008; Kóbor et al., 2015; Takács et al., 2015). Participants were  
189 instructed to collect as many points as possible by inflating an empty virtual balloon on a  
190 screen. Accumulated score for a given balloon, which simultaneously increased with the size  
191 of the balloon after each successful pump, were displayed in the middle of the balloon. Two  
192 response keys on a keyboard were designated either to pump (Z) the balloon or to finish the  
193 actual trial and collect (C) the accumulated score. Instead of collecting the score from the  
194 actual balloon, there were two possible outcomes as a results of a further pump: An increase  
195 in the size of the balloon together with an increase in the score inside (positive feedback) or a  
196

## Decision making and sequence learning

197 balloon burst (negative feedback) could have happened. The balloon burst ended the actual  
198 trial, and the accumulated score on that balloon was lost.

199

200 Importantly, each successful pump increased the probability of a balloon burst and the  
201 accumulated score being lost. The regularity determining balloon bursts was unknown to  
202 participants and followed three principles: (1) balloon bursts for the first and second pumps  
203 were disabled; (2) the maximum number of successful pumps for each balloon was 19; (3) the  
204 probability of a balloon burst was 1/18 for the third pump, 1/17 for the fourth pump, and so on  
205 for each further pump until the 20<sup>th</sup>, where the probability of a balloon burst was 1/1.

206 Compared to the typical variant of the task (Lejuez et al., 2002), we modified the increase of  
207 payoffs to motivate participants to take higher risk and gain more reward (cf. Fein & Chang,  
208 2008). Namely, we assumed that because of the higher appealing characteristic of reward,  
209 participants would be more prone to test the structure of the task. Therefore, reward score  
210 increased by one point at each successful pump: Participants could gain one point for the first  
211 pump, two for the second (i.e., the accumulated score for a given balloon was three), three for  
212 the third (i.e., the accumulated score was six), and so on. Our previous studies (Kardos et al.,  
213 2016; Kóbor et al., 2015; Takács et al., 2015) indicate that behavioral results have been  
214 similar in this variant of the task to that of the typical variant (Lejuez et al., 2002).

215

216 In the middle of the balloon, participants always saw the total accumulated score for a given  
217 balloon. The labels “Total score” depicting the points in the permanent bank, “Last balloon”  
218 depicting the points collected from the previous balloon, and response key options constantly  
219 appeared on the screen during the experiment. After collecting the accumulated reward, a  
220 separate screen indicated the gained score. This screen or the other presenting balloon burst  
221 was followed by the presentation of a new empty (small-sized) balloon indicating the  
222 beginning of the next trial.

223

224 In this version of the BART, participants had to inflate 30 balloons. In order to maximize  
225 reward, the optimal or advantageous number of pumps was 13, but participants had to infer  
226 this information by trial-and-error learning. Therefore, approaching this particular value by  
227 increasing the number of pumps in time could be regarded as the evolvement of sensitivity to  
228 the underlying statistical regularities.

229

### 230 2.2.2 ASRT task

231 The Alternating Serial Reaction Time (ASRT) task was used to measure implicit probabilistic  
232 sequence learning (Nemeth et al., 2010). In this task, the target stimulus was a picture of a  
233 dog’s head, which appeared in one of four horizontally arranged and equally spaced empty  
234 circles on the screen in each trial (Nemeth, Janacsek, Polner, & Kovacs, 2013). Participants  
235 were instructed to press a key (Z, C, B, or M on a QWERTY keyboard) corresponding to  
236 target location as quickly and accurately as they can. The target stimulus remained on the  
237 screen until the participants’ correct response, and the next target was presented on the screen  
238 after 120 ms delay. Unbeknownst to the participants, the presentation of stimuli followed an  
239 eight-element sequence, within which pattern (P) and random (r) elements alternated with  
240 each other (e.g., 2 – r – 1 – r – 3 – r – 4 – r; where numbers denote the four locations on the  
241 screen from left to right, and r’s denote randomly chosen locations out of the four possible  
242 ones). In each block, this eight-element trial sequence was repeated 10 times after five warm-  
243 up trials consisting only of random stimuli (altogether 85 trials in each block).

244

245 As a results of the trial sequence, some patterns of three successive elements (henceforth  
246 referred to as triplets) occur more frequently than others in the ASRT task. In the example

## Decision making and sequence learning

247 above, 2X1, 1X3, 3X4, and 4X2 (X indicates the middle element of the triplet) occurred often  
248 since their third elements could have either been a pattern or a random element. However,  
249 1X2 and 4X3 occurred less frequently since their third element could have only been random.  
250 The former triplet types were labeled as “high-frequency” triplets while the latter types were  
251 labeled as “low-frequency” triplets (Nemeth, Janacsek, & Fiser, 2013). The third element of a  
252 high-frequency triplet was more predictable from the first element of the triplet than in the  
253 case of low-frequency triplets. Accordingly, each target stimulus was categorized as either the  
254 third element of a high- or a low-frequency triplet, and the accuracy and reaction time (RT) of  
255 the response to this item were compared between the two triplet types.  
256

257 While high frequency triplets could be expected with 62.5% of probability, low frequency  
258 triplets had a 37.5% probability to occur. Following the standard analysis protocol of previous  
259 studies (J. H. Howard, Jr. & Howard, 1997; Nemeth, Janacsek, & Fiser, 2013), two types of  
260 low-frequency triplets were eliminated from the analysis: repetitions (e.g., 111, 444) and trills  
261 (e.g., 121, 242). Repetitions and trills were low frequency for all participants, and participants  
262 often show pre-existing response tendencies to them (D. V. Howard et al., 2004). By  
263 eliminating these triplets, we could ensure that any high- versus low-frequency differences  
264 were due to learning and not to pre-existing tendencies. Probabilistic sequence learning is  
265 reflected in the increasingly faster and more accurate responses to high-frequency triplets  
266 compared to that to low-frequency ones over the course of the task (S. Song, J. H. Howard,  
267 Jr., & D. V. Howard, 2007b). In addition, it has been shown that accuracy decreases on low-  
268 frequency (less predictable) triplets as a results of probabilistic sequence learning (D. V.  
269 Howard et al., 2004). Consequently, the obtained learning measure could also be considered  
270 as an index of probabilistic sequence learning. It is important to note that the task remained  
271 implicit for the participants, and according to previous studies, even after an extended  
272 practice, participants were not able to discover the hidden sequence (D. V. Howard et al.,  
273 2004).  
274

### 275 2.3 Procedure

276 The ASRT task consisted of 45 blocks with 85 trials in each. Participants were allowed to take  
277 a short break between blocks. In a separate experimental session 24 hours after completing the  
278 ASRT task, we administered the BART, other neuropsychological tests, and questionnaires  
279 measuring the different aspects of cognition, personality, and social behavior. Here we only  
280 report results of the BART and the ASRT task.  
281

### 282 2.4 Statistical Analyses

#### 283 2.4.1 BART variables

285 We followed a theory-driven approach (Appelt, Milch, Handgraaf, & Weber, 2011) as well as  
286 considered the most frequently published behavioral indices of the BART when deciding  
287 about the individual component measures characterizing BART performance. The choice of  
288 these variables is also critical in regard to the obtainable cluster solution (Morris, Blashfield,  
289 & Satz, 1981). Three variables were determined. First, the *mean adjusted number of pumps*  
290 across balloons (MAP; mean number of pumps on balloons that did not burst) is  
291 conventionally used to measure risk-taking behavior (Lejuez et al., 2002), and it could also  
292 indicate how participants learn from positive feedback. In other words, higher MAP could  
293 mirror a more optimal task-solving strategy. Second, the *number of balloon bursts* (i.e., pop  
294 number) not only indicates the level of risk taking (Schmitz et al., 2016) but also the effect of  
295 negative feedback throughout the task. Besides general risk-taking behavior and insensitivity  
296 to losses, higher pop number could mirror higher propensity to test the structure of the task

## Decision making and sequence learning

297 and a step towards optimal task-solving strategy. In addition, it seems that participants pay  
298 more attention to losses than to gains (Rolison et al., 2012). According to Schmitz et al.  
299 (2016), the number of balloon bursts has been a less ambivalent indicator of risk taking than  
300 the MAP. Therefore, in this study, we consider variability in the MAP as an indicator of  
301 variability in optimal task solving, while variability in the number of balloon bursts is  
302 assumed to be related to variability in risk taking and optimal task solving, as well. The third  
303 variable we used was the *median response time (RT) of pumps* across balloons calculated for  
304 each participant. Response time was measured from the presentation of the (empty or  
305 increased) balloon until the initiation of the next pump. Balloon pumps with RT equal to or  
306 below 100 ms and equal to or higher than 3000 ms were excluded from calculating the  
307 median of all RTs in order to eliminate attentional lapses and premature responses (cf. Hassall  
308 et al., 2013; Kardos et al., 2016; Matzke & Wagenmakers, 2009). According to previous  
309 studies (Hassall et al., 2013; Pleskac & Wershbae, 2014; Wallsten et al., 2005), RT of  
310 balloon pumps could be indicative of how participants explore the reward structure of the task  
311 and make risk assessment before each decision. Basically, generally slower RTs could be  
312 related to more controlled, deliberate pumps and the exploration of reward contingencies  
313 throughout the task (Haffke & Hübner, 2015; Pleskac et al., 2008).

314

315 Although the overall quality (effectiveness) of decision making as well as the adaptation to  
316 task requirements (in line with task instructions) could be captured by the *total score*  
317 (Koscielniak et al., 2016; Schmitz et al., 2016), we did not use this variable for clustering. A  
318 certain value on this variable accumulates the outcome of many different processes and  
319 strategies underlying decision making, and previously, it has been related to scholastic  
320 achievement and working memory but not to risk-taking variables (Schmitz et al., 2016). As  
321 we intended to characterize performance by combining different pieces of information  
322 conveyed by each component measure of the BART, we regarded the total score only as a  
323 measure to externally validate our cluster solution. An appropriate cluster solution should  
324 show differences on a related overall performance variable (i.e., the total score) that has not  
325 been used for clustering (Morris et al., 1981).

326

### 327 **2.4.2 ASRT task performance**

328 Statistical analyses of the ASRT performance followed the protocol established in previous  
329 studies (J. H. Howard, Jr. & Howard, 1997; Romano, Howard, & Howard, 2010). Five-block-  
330 long segments of data were collapsed into larger epochs; thus, we altogether analyzed 9  
331 epochs of the ASRT task. Epochs are labeled consecutively in this paper (1, 2, etc.). For each  
332 participant and epoch, we calculated mean accuracy (percentage of correct responses) and  
333 median RT (only for correct responses), separately for high- and low-frequency triplets. Then  
334 we calculated a learning score as the difference between triplet types in RT (RT for low-  
335 frequency triplets minus RT for high-frequency triplets) and accuracy (accuracy for high-  
336 frequency triplets minus accuracy for low-frequency triplets). Larger score in both measures  
337 indicates larger probabilistic sequence learning.

338

### 339 **2.4.3 The association between BART variables and ASRT task performance**

340 In order to check whether any variability is shared between the two, theoretically related  
341 functions, statistical analysis was performed in two steps. First, we calculated Pearson's linear  
342 correlations between the component measures of the BART and ASRT learning scores.  
343 Second, as a more fine-grained characterization of performance, for identifying subgroups of  
344 distinctive task-solving strategies, we performed an agglomerative hierarchical cluster  
345 analysis with the clustering variables of MAP, number of pops, and median RT of balloon  
346 pumps. We used squared Euclidean distance as the similarity measure and Ward's method as



## Decision making and sequence learning

347 the type of cluster fusion (Morey, Blashfield, & Skinner, 1983). Before performing the cluster  
348 analysis, the three clustering variables were standardized (they were transformed into  $z$   
349 scores). After the hierarchical cluster analysis, to further improve the obtained cluster solution  
350 and create more homogeneous subgroup, we performed  $K$ -means cluster analysis. This  
351 iterative method moves (relocates) some cases from one cluster to another if this reduces the  
352 total error sum of squares of the original cluster solution (Bergman et al., 2003; Takács,  
353 Kóbor, Tárnok, & Vargha, 2014). To evaluate probabilistic sequence learning and compare  
354 probabilistic sequence learning performance of subgroups obtained from the final cluster  
355 solution, mixed design analyses of variance (ANOVAs) were conducted. Greenhouse-Geisser  
356 epsilon ( $\epsilon$ ) correction was used when necessary. Original  $df$  values and corrected  $p$  values (if  
357 applicable) are reported together with partial eta-squared ( $\eta_p^2$ ) as the measure of effect size.  
358 We used LSD (Least Significant Difference) tests for pair-wise comparisons.

### 3. Results

#### 3.1 Change in behavioral performance during the BART

363 To check whether participants have tried to optimize their performance during task solving,  
364 we analyzed the change in behavior over time. We calculated the MAP and the number of  
365 balloon bursts for the first, second, and third 10 balloons, respectively, for the whole sample.  
366 First, a one-way repeated measures ANOVA with BIN (1-10, 11-20, 21-30 balloons) as a  
367 within-subjects factor was performed on the MAP. The main effect of BIN was significant,  
368  $F(2, 358) = 38.37, \epsilon = .883, p < .001, \eta_p^2 = .177$ . Pair-wise comparisons showed that the MAP  
369 gradually increased in the whole sample as the task progressed ( $M_{\text{first bin}} = 7.4, M_{\text{second bin}} = 8.5,$   
370  $M_{\text{third bin}} = 8.9$ , all comparisons are significant,  $ps \leq .008$ ).

372 Second, the same ANOVA was performed on the number of balloon bursts. The main effect  
373 of BIN was significant,  $F(2, 358) = 19.34, p < .001, \eta_p^2 = .098$ . Pair-wise comparisons showed  
374 that the number of balloon bursts increased from the first to the second and third bins ( $M_{\text{first bin}}$   
375  $= 3.5, M_{\text{second bin}} = 4.2, M_{\text{third bin}} = 4.4$ ; first vs. second:  $p < .001$ ; first vs. third:  $p < .001$ ), but  
376 there was no difference between the second and third bins ( $p = .172$ ). These finding suggest  
377 that participants were sensitive to statistical regularities underlying the BART as they tried to  
378 test the structure of the task, at least during the first 20 balloons.

#### 3.2 BART clusters

381 Cluster analysis was performed using the overall MAP, number of balloon bursts, and  
382 response time variables, calculated across 30 balloons. The final cluster solution included four  
383 clusters explaining 67.58% of the variance (considering error sum of squares). The Silhouette  
384 coefficient of the cluster solution was .681. This coefficient indicates the quality of cluster  
385 cohesion and separation, it ranges between -1 and 1, and values greater than .5 indicates  
386 reasonable partitioning of the data. The average of the Homogeneity coefficient (HC) was  
387 0.667. HC is the average of the pairwise distances within a cluster; larger values indicate more  
388 heterogeneous clusters, and an average HC less than 1 indicates good cluster structure. (For  
389 more details on evaluating cluster solutions, see Vargha, Bergman, and Takács (2016)).

391 Detailed demographic and behavioral properties of the four clusters and the entire sample are  
392 presented in Table 1 and Figure 1. We labeled and interpreted the clusters on the basis of their  
393 descriptive characteristics shown on BART behavioral measures and following the notion that  
394 higher MAP and higher number of balloon bursts could indicate more optimal, while higher  
395 RT could indicate more deliberate task solving. Accordingly, the first cluster involved  
396 participants with moderate or average risk-taking (41.7%), the second cluster captured slowly

## Decision making and sequence learning

397 responding participants (8.3%), the third cluster consisted of risk-taker participants (23.9%),  
398 and the fourth cluster consisted of risk-averse ones (26.1%). Participants' mean values on  
399 BART outcome measures in the Average cluster were close to that of the total sample, except  
400 the RT, which was slightly faster. Slowly responding participants experienced relatively low  
401 number of balloon bursts and produced relatively low MAP. Number of balloon bursts and the  
402 MAP were even lower in the Risk-averse cluster, which was otherwise described by average  
403 RTs. The mean of MAP in the Risk-taker cluster was closer to the optimal level than in other  
404 clusters, and participant in this subgroup also experienced a high number of balloon bursts.  
405 According to pair-wise comparisons, each cluster differed from all the others on the total  
406 score: The Risk-taker cluster achieved the highest total score, the Average cluster was the  
407 second, the Slow cluster was the third, and the Risk-averse cluster achieved the lowest total  
408 score (all  $ps \leq .043$ ).

409  
410  
411

PLEASE INSERT FIGURE 1 HERE

### 412 3.3 Associations between the BART and the ASRT task

413 One participant was removed from the following analyses because of high error ratio on the  
414 ASRT task (a mean of 74% for the entire task): This case was an extreme outlier, being well  
415 below the lower whisker of the sample's accuracy data represented as a boxplot (sample's  
416 accuracy:  $M = 95.40\%$ ,  $SD = 2.95\%$ ). Therefore,  $n = 179$  in the remainder of the paper.

417  
418

#### 418 3.3.1 Correlation analysis

419 Regarding the whole sample, there was *no significant* correlation between either the accuracy  
420 learning score of the ASRT task and BART measures (MAP:  $r = .002$ ,  $p = .983$ ; pop:  $r = -$   
421  $.013$ ,  $p = .864$ ; RT:  $r = -.019$ ,  $p = .798$ ; total score:  $r = -.011$ ,  $p = .881$ ;  $df = 177$  in all  
422 analyses), or the RT learning score of the ASRT task and BART measures (MAP:  $r = -.069$ ,  $p$   
423  $= .361$ ; pop:  $r = -.090$ ,  $p = .232$ ; RT:  $r = -.065$ ,  $p = .386$ ; total score:  $r = -.052$ ,  $p = .491$ ;  $df =$   
424  $177$  in all analyses). We also plotted each learning index against each component measure of  
425 the BART, and no indication was found for linear or quadratic relations (for the sake of  
426 brevity, these figures are not included).

427  
428

#### 428 3.3.2 Between-cluster differences on the ASRT task

429 Learning on the ASRT task among the BART strategic clusters was tested with a three-way  
430 mixed ANOVA on *accuracy* with TRIPLET (high- vs. low-frequency) and EPOCH (1-9) as  
431 within-subjects factors and CLUSTER (Average, Slow, Risk-taker, Risk-averse) as a  
432 between-subjects factor. Accuracy data as a function of epoch and trial type for each cluster  
433 are shown in Figure 2. We first present the task-related (within-subjects) effects. The  
434 significant main effect of TRIPLET,  $F(1, 175) = 344.55$ ,  $p < .001$ ,  $\eta_p^2 = .663$ , revealed  
435 probabilistic sequence learning in the entire sample since participants were less accurate on  
436 low-frequency triplets than on high-frequency triplets. The significant main effect of EPOCH,  
437  $F(8, 1400) = 30.55$ ,  $\epsilon = .537$ ,  $p < .001$ ,  $\eta_p^2 = .149$ , also indicated learning, as it changed  
438 mainly due to the decreasing accuracy on low-frequency triplets throughout the task (cf. D. V.  
439 Howard et al., 2004). Specifically, participants became less accurate on low-frequency triplets  
440 than on high-frequency ones as the task progressed, reflected by the significant interaction of  
441 TRIPLET\*EPOCH,  $F(8, 1400) = 14.76$ ,  $\epsilon = .904$ ,  $p < .001$ ,  $\eta_p^2 = .078$ .

442  
443

444 In regard to the between-subjects effects on ASRT accuracy measures, the main effect of  
445 CLUSTER did not reach significance,  $F(3, 175) = 1.91$ ,  $p = .131$ ,  $\eta_p^2 = .032$ , showing that  
446 overall accuracy did not reliably differ between the BART clusters. However, the  
TRIPLET\*CLUSTER interaction was significant,  $F(3, 175) = 3.48$ ,  $p = .017$ ,  $\eta_p^2 = .056$ ,

## Decision making and sequence learning

447 indicating differences between the BART clusters in probabilistic sequence learning. Learning  
448 score was greater in the Risk-taker and Risk-averse clusters than in the Average cluster ( $ps <$   
449  $.010$ , see Figure 3). The EPOCH\*CLUSTER interaction only tended to be significant,  $F(24,$   
450  $1400) = 1.57$ ,  $\epsilon = .357$ ,  $p = .089$ ,  $\eta_p^2 = .026$ . Nevertheless, the TRIPLET\*EPOCH\*CLUSTER  
451 interaction was not significant,  $F(24, 1400) = 0.784$ ,  $\epsilon = .904$ ,  $p = .747$ ,  $\eta_p^2 = .013$ , suggesting  
452 that the time course of probabilistic sequence learning was similar across the BART clusters.

453

454 The same ANOVA was performed on RTs. In regard to the task-related effects, the entire  
455 sample showed probabilistic sequence learning (significant main effects of TRIPLET,  $F(1,$   
456  $175) = 439.93$ ,  $p < .001$ ,  $\eta_p^2 = .715$ , and EPOCH,  $F(8, 1400) = 268.06$ ,  $\epsilon = .416$ ,  $p < .001$ ,  $\eta_p^2$   
457  $= .605$ ). In addition, participants were increasingly faster on high- than on low-frequency  
458 triplets (significant interaction of TRIPLET\*EPOCH,  $F(8, 1400) = 30.22$ ,  $\epsilon = .896$ ,  $p < .001$ ,  
459  $\eta_p^2 = .147$ ).

460

461 Considering the effect of cluster assignment on ASRT RT measures, the main effect of  
462 CLUSTER was not significant,  $F(3, 175) = 0.753$ ,  $p = .522$ ,  $\eta_p^2 = .013$ , indicating that overall  
463 RT was similar across BART clusters. The non-significant TRIPLET\*CLUSTER interaction,  
464  $F(3, 175) = 1.34$ ,  $p = .263$ ,  $\eta_p^2 = .022$ , suggested that probabilistic sequence learning  
465 measured by RT did not differ between BART clusters. Similarly, the time course of learning  
466 was comparable across BART clusters (non-significant interactions of EPOCH\*CLUSTER,  
467  $F(24, 1400) = 0.882$ ,  $\epsilon = .416$ ,  $p = .550$ ,  $\eta_p^2 = .015$ , and TRIPLET\*EPOCH\*CLUSTER,  $F(24,$   
468  $1400) = 0.848$ ,  $\epsilon = .896$ ,  $p = .663$ ,  $\eta_p^2 = .014$ ).

469

470 In sum, there was evidence for probabilistic sequence learning on both accuracy and RT  
471 learning measures in the entire sample. In the case of the accuracy learning measure, this was  
472 modulated by participants' assignment to BART clusters.

473

474 PLEASE INSERT FIGURE 2 HERE

475

476 PLEASE INSERT FIGURE 3 HERE

477

### 478 4. Discussion

479 This study tested whether implicit probabilistic sequence learning and risky decision making  
480 share common variance. To this end, we investigated whether subgroups of participants  
481 performing a sequential risk-taking task with probabilistic underlying structure would have  
482 been characterized by different sensitivity to statistical regularities measured by an  
483 independent probabilistic sequence learning task. According to the results, we successfully  
484 identified four different clusters on the basis of usual behavioral measures of the BART. We  
485 classified participants as average risk-taking, slowly responding, risk-taker, or risk-averse,  
486 respectively. Probabilistic sequence learning was measured by the ASRT task, in which the  
487 entire sample, irrespective of cluster assignment, showed significant learning (cf. J. H.  
488 Howard, Jr. & Howard, 1997; Nemeth et al., 2010; Nemeth, Janacek, Polner, et al., 2013).  
489 More importantly, we found evidence for greater sensitivity to statistical regularities on the  
490 ASRT task in terms of accuracy in the risk-taker and risk-averse subgroups than in  
491 participants with average risk-taking for the first time.

492

493 We could not have detected association between risky decision making and probabilistic  
494 sequence learning if only correlational analysis had been conducted between the individual  
495 component measures of the BART and learning scores of the ASRT task. Although our first  
496 interpretation of correlational results could have been that no relation was discovered between

## Decision making and sequence learning

497 the two constructs, we have chosen to follow a more detailed description of task-solving  
498 profiles with the assumption that this approach might have helped to indirectly reveal the  
499 presence of statistical learning in the BART. Since the type of sequence is different in the two  
500 tasks in many aspects (predicting the appearance of a stimulus at a certain spatial position vs.  
501 predicting the probability of a specific outcome), it has also been possible to assume no  
502 relation between the two performance (cf. Goschke & Bolte, 2012). Eventually, our results  
503 obtained by clustering suggest that real-world sequential decision making and probabilistic  
504 sequence learning are related, at least in some degree. However, as this association could not  
505 be directly demonstrated by correlational analysis, we emphasize that further studies should  
506 be conducted to support this conclusion with the use of simple or more complex statistical  
507 methods. In addition, these studies might directly change the underlying statistical regularities  
508 during particular phases of the BART and track whether this manipulation yields a change in  
509 performance.

511 According to the behavioral measures of risk-related performance, participants in the risk-  
512 taker group should have been more prone to test the structure of the task as they showed a  
513 higher number of risky decisions (see Table 1). Since these participants also showed greater  
514 learning in the ASRT task, they might have been inherently, i.e., in a trait-like manner,  
515 sensitive to statistical regularities found in both tasks. In addition, they were also found to be  
516 less impulsive from a certain aspect as their score was significantly lower on the UPPS Lack  
517 of Premeditation scale than that of the other groups (see Table 1, cf. Kaufman et al., 2010).  
518 Findings of previous studies suggested that optimal risk taking in the BART was associated  
519 with enhanced cognitive capacities shown by neuropsychological and self-report measures as  
520 well as by the change in neural activity of the prefrontal cortical areas and along the fronto-  
521 striatal network (Bogg, Fukunaga, Finn, & Brown, 2012; Lee et al., 2009). Similarly, it is  
522 therefore conceivable that risk-taker participants could have been able to generalize their  
523 advantageous cognitive capacities over different but related domains of learning and  
524 adaptation; however, this assumption should be further tested and the present results should  
525 be replicated in an independent sample.

526  
527 In the case of risk-averse participants, who also showed greater sensitivity to statistical  
528 regularities in the ASRT task, the BART performance essentially differed from that of the  
529 risk-taker or average participants. Risk aversion could be considered as default human  
530 tendency in uncertain decision making tasks such as the BART (Heilbrunner, Hayden, &  
531 Platt, 2010; Lauriola et al., 2014), which should be inhibited in order to achieve an optimal or  
532 close-to-optimal performance. This notion has further been supported by the decreased risk-  
533 taking propensity in previous BART studies testing healthy participants across different  
534 versions of the task (Benjamin & Robbins, 2007; Helfinstein et al., 2014; Lauriola et al.,  
535 2014; Lejuez et al., 2003; Lejuez et al., 2002; Schonberg et al., 2012; Seaman, Stillman,  
536 Howard, & Howard, 2015). According to the results on the change in behavioral performance  
537 during the BART, risk-averse participants could have also acquired statistical contingencies  
538 during sequential risk taking, but they might have been influenced by other factors such as  
539 individual risk preferences, their current emotional or motivational states, experience with the  
540 previous balloon or with similar gambling situations, and general problem-solving strategies  
541 (Brand et al., 2006; Kardos et al., 2016; Kóbor et al., 2015; Schonberg et al., 2011; Sonuga-  
542 Barke, Cortese, Fairchild, & Stringaris, 2015). The latter components also play important role  
543 in decision making, and it is unknown to what extent the BART performance reflects  
544 differences in probabilistic sequence learning or in these components. A further study  
545 manipulating the underlying statistical regularities of the BART could clearly disentangle  
546 trait-like sensitivity to statistical regularities (observed in the case of risk-taker participants)

## Decision making and sequence learning

547 and those adaptation mechanisms that enable close-to-optimal behavior on the task according  
548 to the experienced response-outcome contingencies. However, it would remain an issue  
549 whether probabilistic sequence learning is modulated by the above-mentioned factors at  
550 different phases of the task.

551

552 Beyond risk-taker and risk-averse participants, the applied clustering method provided the  
553 possibility to identify a relatively special subgroup, the slow responders. Slower response  
554 time could be related to explorative, more deliberative risk assessment behind decision  
555 making processes (Pleskac & Wershbale, 2014), which, in regard to the achieved total score  
556 on the BART, might not be the most effective task-solving strategy. This observed pattern  
557 could also mirror some aspects of a model-based strategy used by the participants (for the  
558 two-system reinforcement learning architecture, see Daw, Gershman, Seymour, Dayan, &  
559 Dolan, 2011); however, the latter explanation should be further tested and until then treated  
560 with caution as the slowly responding group was the most heterogeneous and the smallest in  
561 sample size.

562

563 In this study, group differences emerged in the accuracy learning measure but not in the RT  
564 learning measure. It has been suggested that accuracy and RT reflect different aspects of  
565 probabilistic sequence learning in the ASRT task (S. Song, J. H. Howard, & D. V. Howard,  
566 2007a; Song et al., 2007b). The widening gap between RTs for high- and low-frequency  
567 triplets represents mastering the structure of the task via the automatization of predictable  
568 responses (J. H. Howard, Jr. & Howard, 1997; Nemeth, Janacsek, & Fiser, 2013). Although  
569 RT has been used as the conventional learning measure in the ASRT task, probabilistic  
570 sequence learning consists of multiple processes (Nemeth, Janacsek, Király, et al., 2013), and  
571 other measures could go beyond the automatization of responses. Namely, accuracy has been  
572 a particularly good indicator of prediction errors (Song et al., 2007a), which have also been  
573 thought to reflect learning of statistical regularities (J. H. Howard, Jr. & Howard, 1997; Song  
574 et al., 2007a; Song et al., 2007b). In particular, as participants gain experience about the  
575 underlying statistical regularity of the task (i.e., they learn the high-frequency triplets), they  
576 implicitly generate predictions about the likely spatial position of the next stimulus. If the next  
577 stimulus is a low-frequency triplet, occurrence of a prediction error is more likely because  
578 they expect the high-frequency triplets to a greater extent. As a consequence, overall accuracy  
579 also decreases, which pattern has often been reported in probabilistic learning tasks (Curran,  
580 1997; Feeney, Howard, & Howard, 2002; D. V. Howard & Howard, 2001; J. H. Howard, Jr.  
581 & Howard, 1997; Schvaneveldt & Gomez, 1998). Thus, in the present study, participants with  
582 distinctive risk-taking profiles differed in the prediction-related processes of statistical  
583 learning.

584

585 This particular finding could originate from the fact that the BART is not a speeded RT task,  
586 and in this version, participants had unlimited time to initiate a pumping response or to collect  
587 the accumulated reward. Response time variability in the BART has been indicative of  
588 different task-solving strategies involving slower, more deliberative decisions and faster,  
589 more automatized decisions (Hassall et al., 2013; Pleskac & Wershbale, 2014). Therefore,  
590 overall response time, which was merely one of the BART component measures considered in  
591 our analysis, might have only been partially related to the RT learning score of the ASRT  
592 task. However, no indication was found for this relation here. Nevertheless, to more precisely  
593 measure the underlying processes of probabilistic sequence learning, further studies should  
594 test both learning measures (accuracy and RT) when investigating the relation of statistical  
595 learning and risk-taking behavior.

596

## Decision making and sequence learning

597 Another crucial implication of the obtained cluster solution is that a single or a couple of  
598 behavioral measures of BART performance might not reliably predict maladaptive risk-taking  
599 behavior or the chance to further develop certain psychiatric conditions (e.g., substance  
600 abuse/dependence, bipolar disorder, ADHD, etc.). Our results demonstrate that high MAP  
601 score does not necessarily indicate excessive risk taking or increased level of impulsivity.  
602 Indeed, risk-taker participants collected the largest amount of reward in the BART and  
603 outperformed others in a probabilistic sequence learning task, during which they were  
604 completely unaware of the acquired regularities. To proceed with these findings, the  
605 association between performance on the BART and on the ASRT task should be examined in  
606 a concurrent study with clinical populations having atypical fronto-striatal functioning, as  
607 their relation has not been clarified in the case of impaired performance.  
608

609 Although we found evidence for connections between probabilistic sequence learning and  
610 risky decision making, the *exact stage* of decision making that is related to probabilistic  
611 sequence learning remains uncertain. According to the unified neuroeconomic model of  
612 decision making proposed by Sonuga-Barke et al. (2015), decision-making processes involve  
613 different psychological stages, which are controlled by distributed and interacting neural  
614 circuits. As both implicit and explicit processes affect the different stages of decision making,  
615 which, due to the structure of the BART, can be tested separately, further studies should  
616 clarify the exact nature of the relation we found here using neuroimaging methods.  
617

618 Taken together, the present study went beyond the quantification of basic behavioral indices  
619 related to BART performance towards a complex characterization of task solving, which more  
620 clearly reflected individual differences in risky decision making. Results showed common  
621 underlying processes in risky decision making and statistical learning. In addition, we  
622 highlighted an adaptive aspect of distinctive risk-taking profiles, which could provide testable  
623 assumptions for further neuroimaging studies. Finally, our results could contribute to the  
624 refinement of complex neurocognitive models of decision making that is an essential factor in  
625 both healthy and impaired daily functioning.  
626

### 627 **Conflict of Interest**

628 The authors declare that the research was conducted in the absence of any commercial or  
629 financial relationships that could be construed as a potential conflict of interest.  
630

### 631 **Author Contributions**

632 AK: basic and advanced data analysis and interpretation, drafting of the work, final approval  
633 of the version to be published, agreement to be accountable for all aspects of the work; ÁT:  
634 basic data analysis and interpretation, drafting of the work, final approval of the version to be  
635 published, agreement to be accountable for all aspects of the work; KJ: design of research,  
636 supervision of data acquisition, basic data analysis and interpretation, drafting of the work,  
637 final approval of the version to be published, agreement to be accountable for all aspects of  
638 the work; ZK: interpretation of results, drafting of the work, final approval of the version to  
639 be published, agreement to be accountable for all aspects of the work; CsV: interpretation of  
640 results, drafting of the work, final approval of the version to be published, agreement to be  
641 accountable for all aspects of the work; DN: supervision of the project, design of research,  
642 supervision of data acquisition, interpretation of results, drafting of the work, final approval of  
643 the version to be published, agreement to be accountable for all aspects of the work.  
644

## Decision making and sequence learning

### 645 **Funding**

646 This research was supported by the Research and Technology Innovation Fund, Hungarian  
647 Brain Research Program (KTIA NAP 13-2-2015-0002); Hungarian Scientific Research Fund  
648 (OTKA NF 105878); Postdoctoral Fellowship of the Hungarian Academy of Sciences (to  
649 AK); and Janos Bolyai Research Fellowship of the Hungarian Academy of Sciences (to KJ).

650

### 651 **References**

652 Appelt, K. C., Milch, K. F., Handgraaf, M. J. J., & Weber, E. U. (2011). The decision making  
653 individual differences inventory and guidelines for the study of individual differences  
654 in judgment and decision-making research. *Judgment and Decision Making*, 6(3), 252-  
655 262.

656 Batterink, L. J., Reber, P. J., Neville, H. J., & Paller, K. A. (2015). Implicit and explicit  
657 contributions to statistical learning. *Journal of Memory and Language*, 83, 62-78.  
658 doi:10.1016/j.jml.2015.04.004

659 Bechara, A., Damasio, H., Tranel, D., & Damasio, A. R. (2005). The Iowa gambling task and  
660 the somatic marker hypothesis: Some questions and answers. *Trends in Cognitive  
661 Sciences*, 9(4), 159-162; discussion 162-154. doi:10.1016/j.tics.2005.02.002

662 Benjamin, A. M., & Robbins, S. J. (2007). The role of framing effects in performance on the  
663 balloon analogue risk task (bart). *Personality and Individual Differences*, 43(2), 221-  
664 230. doi:10.1016/j.paid.2006.11.026

665 Bergman, L. R., Magnusson, D., & El-Khoury, B. M. (2003). *Studying individual development  
666 in an interindividual context: A person-oriented approach*. Mahwah, NJ US:  
667 Lawrence Erlbaum Associates Publishers.

668 Bogg, T., Fukunaga, R., Finn, P. R., & Brown, J. W. (2012). Cognitive control links alcohol  
669 use, trait disinhibition, and reduced cognitive capacity: Evidence for medial prefrontal  
670 cortex dysregulation during reward-seeking behavior. *Drug and Alcohol Dependence*,  
671 122(1-2), 112-118. doi:10.1016/j.drugalcdep.2011.09.018

672 Bornoalova, M. A., Cashman-Rolls, A., O'Donnell, J. M., Ettinger, K., Richards, J. B.,  
673 deWit, H., & Lejuez, C. W. (2009). Risk taking differences on a behavioral task as a  
674 function of potential reward/loss magnitude and individual differences in impulsivity  
675 and sensation seeking. *Pharmacology, Biochemistry, and Behavior*, 93(3), 258-262.  
676 doi:10.1016/j.pbb.2008.10.023

677 Brand, M., Labudda, K., & Markowitsch, H. J. (2006). Neuropsychological correlates of  
678 decision-making in ambiguous and risky situations. *Neural Networks*, 19(8), 1266-  
679 1276. doi:10.1016/j.neunet.2006.03.001

680 Campbell, J. A., Samartgis, J. R., & Crowe, S. F. (2013). Impaired decision making on the  
681 balloon analogue risk task as a result of long-term alcohol use. *Journal of Clinical and  
682 Experimental Neuropsychology*, 35(10), 1071-1081.  
683 doi:10.1080/13803395.2013.856382

684 Chaudhuri, R., & Fiete, I. (2016). Computational principles of memory. *Nature Neuroscience*,  
685 19(3), 394-403. doi:10.1038/nn.4237

686 Courtney, K. E., Arellano, R., Barkley-Levenson, E., Galvan, A., Poldrack, R. A., Mackillop,  
687 J., . . . Ray, L. A. (2012). The relationship between measures of impulsivity and  
688 alcohol misuse: An integrative structural equation modeling approach. *Alcoholism,  
689 Clinical and Experimental Research*, 36(6), 923-931. doi:10.1111/j.1530-  
690 0277.2011.01635.x

691 Curran, T. (1997). Effects of aging on implicit sequence learning: Accounting for sequence  
692 structure and explicit knowledge. *Psychological Research*, 60(1-2), 24-41.  
693 doi:10.1007/BF00419678

## Decision making and sequence learning

- 694 Daw, N. D., Gershman, S. J., Seymour, B., Dayan, P., & Dolan, R. J. (2011). Model-based  
695 influences on humans' choices and striatal prediction errors. *Neuron*, *69*(6), 1204-  
696 1215. doi:10.1016/j.neuron.2011.02.027
- 697 Euser, A. S., Greaves-Lord, K., Crowley, M. J., Evans, B. E., Huizink, A. C., & Franken, I. H.  
698 A. (2013). Blunted feedback processing during risky decision making in adolescents  
699 with a parental history of substance use disorders. *Development and Psychopathology*,  
700 *25*(4pt1), 1119-1136. doi:10.1017/S0954579413000412
- 701 Euser, A. S., van Meel, C. S., Snelleman, M., & Franken, I. H. (2011). Acute effects of  
702 alcohol on feedback processing and outcome evaluation during risky decision-making:  
703 An erp study. *Psychopharmacology*, *217*(1), 111-125. doi:10.1007/s00213-011-2264-  
704 x
- 705 Fecteau, S., Pascual-Leone, A., Zald, D. H., Liguori, P., Théoret, H., Boggio, P. S., & Fregni,  
706 F. (2007). Activation of prefrontal cortex by transcranial direct current stimulation  
707 reduces appetite for risk during ambiguous decision making. *The Journal of*  
708 *Neuroscience*, *27*(23), 6212-6218. doi:10.1523/jneurosci.0314-07.2007
- 709 Feeney, J. J., Howard, J. H., Jr., & Howard, D. V. (2002). Implicit learning of higher order  
710 sequences in middle age. *Psychology and Aging*, *17*(2), 351-355. doi:10.1037//0882-  
711 7974.17.2.351
- 712 Fein, G., & Chang, M. (2008). Smaller feedback error amplitudes during the bart are associated  
713 with a greater family history density of alcohol problems in treatment-naive  
714 alcoholics. *Drug and Alcohol Dependence*, *92*(1-3), 141-148.  
715 doi:10.1016/j.drugalcdep.2007.07.017
- 716 Goschke, T., & Bolte, A. (2012). On the modularity of implicit sequence learning:  
717 Independent acquisition of spatial, symbolic, and manual sequences. *Cognitive*  
718 *Psychology*, *65*(2), 284-320. doi:10.1016/j.cogpsych.2012.04.002
- 719 Haffke, P., & Hübner, R. (2015). Effects of different feedback types on information  
720 integration in repeated monetary gambles. *Frontiers in Psychology*, *5*.  
721 doi:10.3389/fpsyg.2014.01597
- 722 Hassall, C. D., Holland, K., & Krigolson, O. E. (2013). What do I do now? An  
723 electroencephalographic investigation of the explore/exploit dilemma. *Neuroscience*,  
724 *228*, 361-370. doi:10.1016/j.neuroscience.2012.10.040
- 725 Heilbronner, S. R., Hayden, B. Y., & Platt, M. L. (2010). Neuroeconomics of risk-sensitive  
726 decision making. In G. J. Madden & W. K. Bickel (Eds.), *Impulsivity: The behavioral*  
727 *and neurological science of discounting* (pp. 159-187). Washington, DC, US:  
728 American Psychological Association.
- 729 Helfinstein, S. M., Schonberg, T., Congdon, E., Karlsgodt, K. H., Mumford, J. A., Sabb, F.  
730 W., . . . Poldrack, R. A. (2014). Predicting risky choices from brain activity patterns.  
731 *Proceedings of the National Academy of Sciences*. doi:10.1073/pnas.1321728111
- 732 Howard, D. V., & Howard, J. H., Jr. (2001). When it does hurt to try: Adult age differences in  
733 the effects of instructions on implicit pattern learning. *Psychonomic Bulletin &*  
734 *Review*, *8*(4), 798-805. doi:10.3758/BF03196220
- 735 Howard, D. V., Howard, J. H., Jr., Japikse, K., DiYanni, C., Thompson, A., & Somberg, R.  
736 (2004). Implicit sequence learning: Effects of level of structure, adult age, and  
737 extended practice. *Psychology and Aging*, *19*(1), 79-92. doi:10.1037/0882-  
738 7974.19.1.79
- 739 Howard, J. H., Jr., & Howard, D. V. (1997). Age differences in implicit learning of higher  
740 order dependencies in serial patterns. *Psychology and Aging*, *12*(4), 634-656.  
741 doi:10.1037/0882-7974.12.4.634



## Decision making and sequence learning

- 742 Kardos, Z., Kóbor, A., Takács, A., Tóth, B., Boha, R., File, B., & Molnár, M. (2016). Age-  
743 related characteristics of risky decision-making and progressive expectation formation.  
744 *Behavioural Brain Research*, 312, 405-414. doi:10.1016/j.bbr.2016.07.003
- 745 Kaufman, S. B., Deyoung, C. G., Gray, J. R., Jimenez, L., Brown, J., & Mackintosh, N.  
746 (2010). Implicit learning as an ability. *Cognition*, 116(3), 321-340.  
747 doi:10.1016/j.cognition.2010.05.011
- 748 Kiat, J., Straley, E., & Cheadle, J. E. (2016). Escalating risk and the moderating effect of  
749 resistance to peer influence on the p200 and feedback-related negativity. *Social*  
750 *Cognitive and Affective Neuroscience*, 11(3), 377-386. doi:10.1093/scan/nsv121
- 751 Kóbor, A., Takács, A., Janacsek, K., Németh, D., Honbolygó, F., & Csépe, V. (2015).  
752 Different strategies underlying uncertain decision making: Higher executive  
753 performance is associated with enhanced feedback-related negativity.  
754 *Psychophysiology*, 52(3), 367-377. doi:10.1111/psyp.12331
- 755 Kóbor, A., Takács, Á., Urbán, R., & Csépe, V. (2012). The latent classes of subclinical adhd  
756 symptoms: Convergences of multiple informant reports. *Research in Developmental*  
757 *Disabilities*, 33(5), 1677-1689. doi:10.1016/j.ridd.2012.04.008
- 758 Kohno, M., Ghahremani, D. G., Morales, A. M., Robertson, C. L., Ishibashi, K., Morgan, A.  
759 T., . . . London, E. D. (2015). Risk-taking behavior: Dopamine d2/d3 receptors,  
760 feedback, and frontolimbic activity. *Cerebral Cortex*, 25(1), 236-245.  
761 doi:10.1093/cercor/bht218
- 762 Koscielniak, M., Rydzewska, K., & Sedek, G. (2016). Effects of age and initial risk  
763 perception on balloon analog risk task: The mediating role of processing speed and  
764 need for cognitive closure. *Frontiers in Psychology*, 7(659).  
765 doi:10.3389/fpsyg.2016.00659
- 766 Lauriola, M., Panno, A., Levin, I. P., & Lejuez, C. W. (2014). Individual differences in risky  
767 decision making: A meta-analysis of sensation seeking and impulsivity with the  
768 balloon analogue risk task. *Journal of Behavioral Decision Making*, 27(1), 20-36.  
769 doi:10.1002/bdm.1784
- 770 Lee, T. M., Guo, L. G., Shi, H. Z., Li, Y. Z., Luo, Y. J., Sung, C. Y., . . . Lee, T. M. (2009).  
771 Neural correlates of traditional Chinese medicine induced advantageous risk-taking  
772 decision making. *Brain and Cognition*, 71(3), 354-361.  
773 doi:10.1016/j.bandc.2009.06.006
- 774 Lejuez, C. W., Aklin, W. M., Jones, H. A., Richards, J. B., Strong, D. R., Kahler, C. W., &  
775 Read, J. P. (2003). The balloon analogue risk task (bart) differentiates smokers and  
776 nonsmokers. *Experimental and Clinical Psychopharmacology*, 11(1), 26-33.  
777 doi:10.1037/1064-1297.11.1.26
- 778 Lejuez, C. W., Read, J. P., Kahler, C. W., Richards, J. B., Ramsey, S. E., Stuart, G. L., . . .  
779 Brown, R. A. (2002). Evaluation of a behavioral measure of risk taking: The balloon  
780 analogue risk task (BART). *Journal of Experimental Psychology: Applied*, 8(2), 75-  
781 84. doi:10.1037//1076-898X.8.2.75
- 782 Lim, S. W. H., Yuen, A. Y. L., & Tong, E. M. W. (2015). Global-local visual processing  
783 impacts risk taking behaviors, but only at first. *Frontiers in Psychology*, 6, 1257.  
784 doi:10.3389/fpsyg.2015.01257
- 785 Matzke, D., & Wagenmakers, E.-J. (2009). Psychological interpretation of the ex-gaussian  
786 and shifted wald parameters: A diffusion model analysis. *Psychonomic Bulletin &*  
787 *Review*, 16(5), 798-817. doi:10.3758/PBR.16.5.798
- 788 Morey, L. C., Blashfield, R. K., & Skinner, H. A. (1983). A comparison of cluster analysis  
789 techniques within a sequential validation framework. *Multivariate Behavioral*  
790 *Research*, 18(3), 309-329. doi:10.1207/s15327906mbr1803\_4

## Decision making and sequence learning

- 791 Morris, R., Blashfield, R., & Satz, P. (1981). Neuropsychology and cluster analysis:  
792 Potentials and problems. *Journal of Clinical Neuropsychology*, 3(1), 79-99.  
793 doi:10.1080/01688638108403115
- 794 Mosha, N., & Robertson, E. M. (2016). Unstable memories create a high-level representation  
795 that enables learning transfer. *Current Biology*, 26(1), 100-105.  
796 doi:10.1016/j.cub.2015.11.035
- 797 Nemeth, D., Janacek, K., & Fiser, J. (2013). Age-dependent and coordinated shift in  
798 performance between implicit and explicit skill learning. *Frontiers in Computational*  
799 *Neuroscience*, 7, 147. doi:10.3389/fncom.2013.00147
- 800 Nemeth, D., Janacek, K., Király, K., Londe, Z., Németh, K., Fazekas, K., . . . Csányi, A.  
801 (2013). Probabilistic sequence learning in mild cognitive impairment. *Frontiers in*  
802 *Human Neuroscience*, 7, 318. doi:10.3389/fnhum.2013.00318
- 803 Nemeth, D., Janacek, K., Londe, Z., Ullman, M. T., Howard, D. V., & Howard, J. H., Jr.  
804 (2010). Sleep has no critical role in implicit motor sequence learning in young and old  
805 adults. *Experimental Brain Research*, 201(2), 351-358. doi:10.1007/s00221-009-2024-  
806 x
- 807 Nemeth, D., Janacek, K., Polner, B., & Kovacs, Z. A. (2013). Boosting human learning by  
808 hypnosis. *Cerebral Cortex*, 23(4), 801-805. doi:10.1093/cercor/bhs068
- 809 Patton, J. H., Stanford, M. S., & Barratt, E. S. (1995). Factor structure of the barratt  
810 impulsiveness scale. *Journal of Clinical Psychology*, 51(6), 768-774.  
811 doi:10.1002/1097-4679(199511)51:6<768::aid-jclp2270510607>3.0.co;2-1
- 812 Pleskac, T. J., Wallsten, T. S., Wang, P., & Lejuez, C. W. (2008). Development of an  
813 automatic response mode to improve the clinical utility of sequential risk-taking tasks.  
814 *Experimental and Clinical Psychopharmacology*, 16(6), 555-564.  
815 doi:10.1037/a0014245
- 816 Pleskac, T. J., & Wershvale, A. (2014). Making assessments while taking repeated risks: A  
817 pattern of multiple response pathways. *Journal of Experimental Psychology: General*,  
818 143(1), 142-162. doi:10.1037/a0031106
- 819 Robertson, E. M. (2012). New insights in human memory interference and consolidation.  
820 *Current Biology*, 22(2), R66-R71. doi:10.1016/j.cub.2011.11.051
- 821 Rolison, J. J., Hanoch, Y., & Wood, S. (2012). Risky decision making in younger and older  
822 adults: The role of learning. *Psychology and Aging*, 27(1), 129-140.  
823 doi:10.1037/a0024689
- 824 Romano, J. C., Howard, J. H., Jr., & Howard, D. V. (2010). One-year retention of general and  
825 sequence-specific skills in a probabilistic, serial reaction time task. *Memory*, 18(4),  
826 427-441. doi:10.1080/09658211003742680
- 827 Schiebener, J., Wegmann, E., Pawlikowski, M., & Brand, M. (2012). Anchor effects in  
828 decision making can be reduced by the interaction between goal monitoring and the  
829 level of the decision maker's executive functions. *Cognitive Processing*, 13(4), 321-  
830 332. doi:10.1007/s10339-012-0522-4
- 831 Schmitz, F., Manske, K., Preckel, F., & Wilhelm, O. (2016). The multiple faces of risk-taking.  
832 *European Journal of Psychological Assessment*, 32(1), 17-38. doi:10.1027/1015-  
833 5759/a000335
- 834 Schonberg, T., Fox, C. R., Mumford, J. A., Congdon, E., Trepel, C., & Poldrack, R. A.  
835 (2012). Decreasing ventromedial prefrontal cortex activity during sequential risk-  
836 taking: An fMRI investigation of the balloon analogue risk task. *Frontiers in*  
837 *Neuroscience*, 6. doi:10.3389/fnins.2012.00080
- 838 Schonberg, T., Fox, C. R., & Poldrack, R. A. (2011). Mind the gap: Bridging economic and  
839 naturalistic risk-taking with cognitive neuroscience. *Trends in Cognitive Sciences*,  
840 15(1), 11-19. doi:10.1016/j.tics.2010.10.002

## Decision making and sequence learning

- 841 Schvaneveldt, R. W., & Gomez, R. L. (1998). Attention and probabilistic sequence learning.  
842 *Psychological Research*, 61(3), 175-190. doi:10.1007/s004260050023
- 843 Seaman, K. L., Stillman, C. M., Howard, D. V., & Howard, J. H., Jr. (2015). Risky decision-  
844 making is associated with residential choice in healthy older adults. *Frontiers in*  
845 *Psychology*, 6, 1192. doi:10.3389/fpsyg.2015.01192
- 846 Song, S., Howard, J. H., & Howard, D. V. (2007a). Implicit probabilistic sequence learning is  
847 independent of explicit awareness. *Learning & Memory*, 14(3), 167-176.  
848 doi:10.1101/lm.437407
- 849 Song, S., Howard, J. H., Jr., & Howard, D. V. (2007b). Sleep does not benefit probabilistic  
850 motor sequence learning. *The Journal of Neuroscience*, 27(46), 12475-12483.  
851 doi:10.1523/jneurosci.2062-07.2007
- 852 Sonuga-Barke, E. J., Cortese, S., Fairchild, G., & Stringaris, A. (2015). Annual research  
853 review: Transdiagnostic neuroscience of child and adolescent mental disorders -  
854 differentiating decision making in attention-deficit/hyperactivity disorder, conduct  
855 disorder, depression, and anxiety. *Journal of Child Psychology and Psychiatry, and*  
856 *Allied Disciplines*. doi:10.1111/jcpp.12496
- 857 Takács, Á., Kóbor, A., Janacsek, K., Honbolygó, F., Csépe, V., & Németh, D. (2015). High  
858 trait anxiety is associated with attenuated feedback-related negativity in risky decision  
859 making. *Neuroscience Letters*, 600, 188-192. doi:10.1016/j.neulet.2015.06.022
- 860 Takács, Á., Kóbor, A., Tárnok, Z., & Vargha, A. (2014). Neuropsychological profiles and  
861 behavioral ratings in adhd overlap only in the dimension of syndrome severity.  
862 *Advances in Psychiatry*, 2014, 1-8. doi:10.1155/2014/502685
- 863 van Ravenzwaaij, D., Dutilh, G., & Wagenmakers, E.-J. (2011). Cognitive model  
864 decomposition of the BART: Assessment and application. *Journal of Mathematical*  
865 *Psychology*, 55(1), 94-105. doi:10.1016/j.jmp.2010.08.010
- 866 Varga, G., Szekely, A., Antal, P., Sarkozy, P., Nemoda, Z., Demetrovics, Z., & Sasvari-  
867 Szekely, M. (2012). Additive effects of serotonergic and dopaminergic  
868 polymorphisms on trait impulsivity. *American Journal of Medical Genetics Part B:*  
869 *Neuropsychiatric Genetics*, 159B(3), 281-288. doi:10.1002/ajmg.b.32025
- 870 Vargha, A., Bergman, L. R., & Takács, S. (2016). Performing cluster analysis within a  
871 person-oriented context: Some methods for evaluating the quality of cluster solutions.  
872 *Journal of Person-Oriented Research*, 2(1-2), 78-86. doi:10.17505/jpor.2016.08
- 873 Vigil-Colet, A. (2007). Impulsivity and decision making in the balloon analogue risk-taking  
874 task. *Personality and Individual Differences*, 43(1), 37-45.  
875 doi:10.1016/j.paid.2006.11.005
- 876 Wallsten, T. S., Pleskac, T. J., & Lejuez, C. W. (2005). Modeling behavior in a clinically  
877 diagnostic sequential risk-taking task. *Psychological Review*, 112(4), 862-880.  
878 doi:10.1037/0033-295x.112.4.862
- 879 Whiteside, S. P., & Lynam, D. R. (2001). The five factor model and impulsivity: Using a  
880 structural model of personality to understand impulsivity. *Personality and Individual*  
881 *Differences*, 30(4), 669-689. doi:10.1016/s0191-8869(00)00064-7
- 882 Wichary, S., Pachur, T., Kościelniak, M., Rydzewska, K., & Sedek, G. (2017). Response:  
883 Commentary: Effects of age and initial risk perception on balloon analog risk task:  
884 The mediating role of processing speed and need for cognitive closure. *Frontiers in*  
885 *Psychology*, 8(541). doi:10.3389/fpsyg.2017.00541
- 886 Wichary, S., Pachur, T., & Li, M. (2015). Risk-taking tendencies in prisoners and  
887 nonprisoners: Does gender matter? *Journal of Behavioral Decision Making*, 28(5),  
888 504-514. doi:10.1002/bdm.1866
- 889

## Decision making and sequence learning

### 890 Tables

891

892 Table 1. Descriptive data of demographic variables, BART performance, and rating scales in

893 the four strategic clusters and the total sample.

| Cluster                               | Average<br><i>M(SD)</i> | Slow<br><i>M(SD)</i> | Risk-taker<br><i>M(SD)</i> | Risk-averse<br><i>M(SD)</i> | $F/\chi^2$ | Total sample<br><i>M(SD)</i> |
|---------------------------------------|-------------------------|----------------------|----------------------------|-----------------------------|------------|------------------------------|
| <i>n</i>                              | 75                      | 15                   | 43                         | 47                          | --         | 180                          |
| HC                                    | 0.42                    | 2.38                 | 0.63                       | 0.54                        | --         | --                           |
| Gender [Male/Female]                  | 14/61                   | 2/13                 | 6/37                       | 6/41                        | 0.97       | 28/152                       |
| Age [years] <sup>a</sup>              | 21.3 (3.3)              | 22.5 (4.6)           | 21.7 (4.8)                 | 21.8 (4.5)                  | 0.41       | 21.6 (4.1)                   |
| Education [years] <sup>a</sup>        | 14.7 (2.0)              | 15.6 (3.1)           | 14.5 (1.9)                 | 14.5 (2.2)                  | 1.26       | 14.7 (2.2)                   |
| Mean adjusted pumps                   | 8.1 (1.0)               | 7.2 (2.0)            | 11.1 (1.2)                 | 5.8 (1.1)                   | 144.11***  | 8.2 (2.2)                    |
| Number of balloon bursts <sup>b</sup> | 12.0 (2.1)              | 10.2 (3.5)           | 17.2 (2.9)                 | 7.9 (2.2)                   | 95.27***   | 12.0 (4.1)                   |
| Response time [ms] <sup>a</sup>       | 383 (80)                | 1000 (293)           | 395 (76)                   | 441 (106)                   | 50.24***   | 452 (204)                    |
| Total score                           | 746.2 (208.1)           | 627.9 (234.1)        | 906.6 (224.6)              | 490.0 (170.9)               | 32.63***   | 707.8 (254.3)                |
| BIS TS                                | 61.6 (11.6)             | 63.6 (11.6)          | 57.5 (10.3)                | 61.3 (11.7)                 | 1.72       | 60.7 (11.4)                  |
| UPPS Urgency                          | 2.27 (0.51)             | 2.61 (0.57)          | 2.22 (0.52)                | 2.38 (0.61)                 | 2.31       | 2.31 (0.55)                  |
| UPPS Premeditation                    | 2.15 (0.49)             | 2.09 (0.60)          | 1.79 (0.47)                | 2.07 (0.55)                 | 4.74**     | 2.04 (0.53)                  |
| UPPS Perseverance <sup>a</sup>        | 1.99 (0.54)             | 2.08 (0.59)          | 1.79 (0.43)                | 1.99 (0.64)                 | 4.08       | 1.95 (0.55)                  |
| UPPS Sensation Seeking                | 2.71 (0.58)             | 2.71 (0.57)          | 2.71 (0.68)                | 2.71 (0.52)                 | < 0.01     | 2.71 (0.58)                  |

894 *Note.* Data on one participant's age (belonging to the Risk-averse cluster) and on another's education (belonging  
895 to the Average cluster) were missing because of technical reasons. <sup>a</sup> In case of violating the assumption of  
896 normality, Kruskal-Wallis test was performed. <sup>b</sup> In case of violating the assumption of homogeneity of variances,  
897 the robust Welch test of equality of means was performed. HC = Homogeneity coefficient; BIS TS = Barratt  
898 Impulsiveness Scale total score. UPPS = Urgency, Lack of Premeditation, Lack of Perseverance, and Sensation  
899 Seeking. The Barratt Impulsiveness Scale (Patton, Stanford, & Barratt, 1995, translated to Hungarian by Anna  
900 Székely, Zsolt Demetrovics, and Sándor Rózsa, see also; Varga et al., 2012) and the four facets of the UPPS  
901 Impulsive Behavior Scale (Whiteside & Lynam, 2001) were used to assess trait impulsivity.

902 \*\*\* $p < .001$ ; \*\*  $p < .01$

903

## Decision making and sequence learning

### 904 **Figure Legends**

905

906 Figure 1. Behavioral profiles of the four clusters on the three BART variables used for  
907 clustering. Error bars denote standard error of mean. MAP = mean adjusted number of pumps,  
908 Bursts = Number of balloon bursts, RT = Response time.

909

910 Figure 2. Temporal dynamics of probabilistic sequence learning. Data are presented on the  
911 accuracy measure across epochs (1-9) as a function of trial type (high- vs. low-frequency  
912 triplets), separately for each cluster. (A) Average, (B) Slow, (C) Risk-taker, (D) Risk-averse.  
913 Error bars denote standard error of mean.

914

915 Figure 3. Learning score measure in accuracy for each strategic cluster. Learning score:  
916 difference between high- and low-frequency triplets. Error bars denote standard error of  
917 mean.

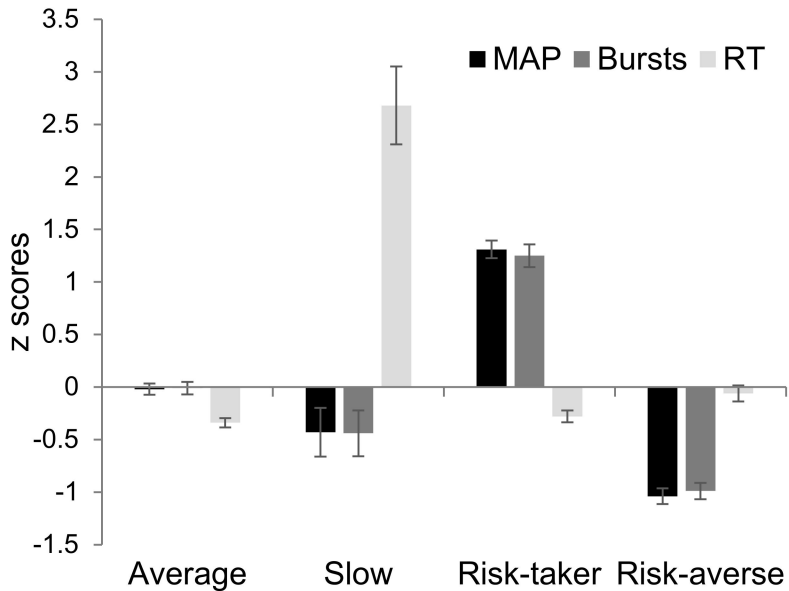

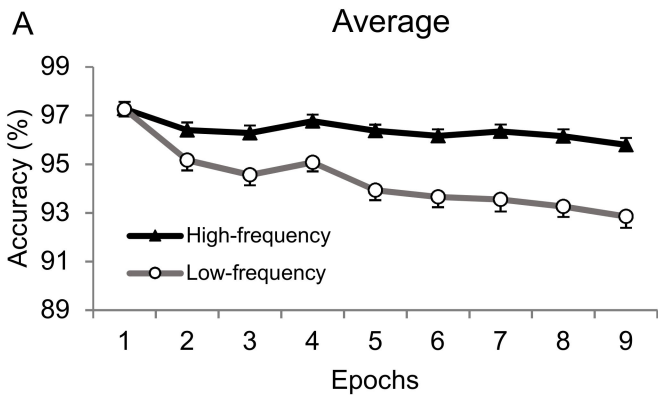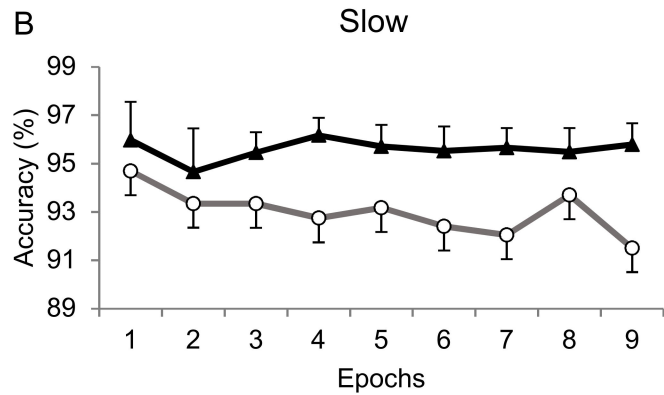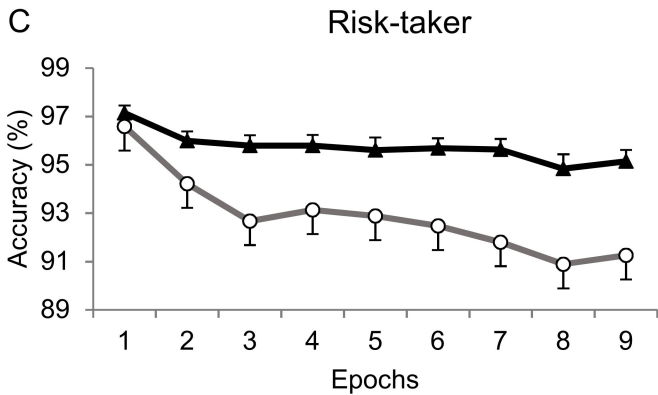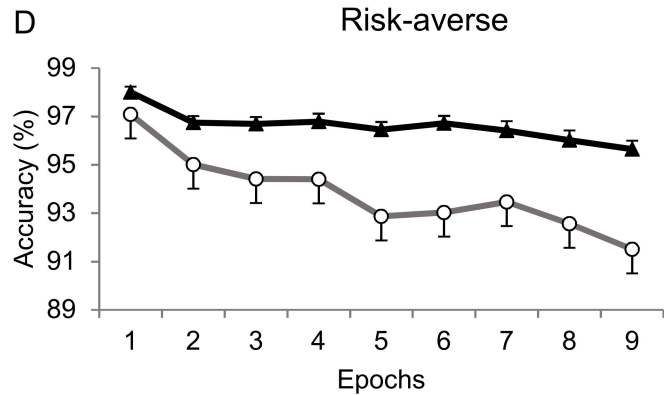

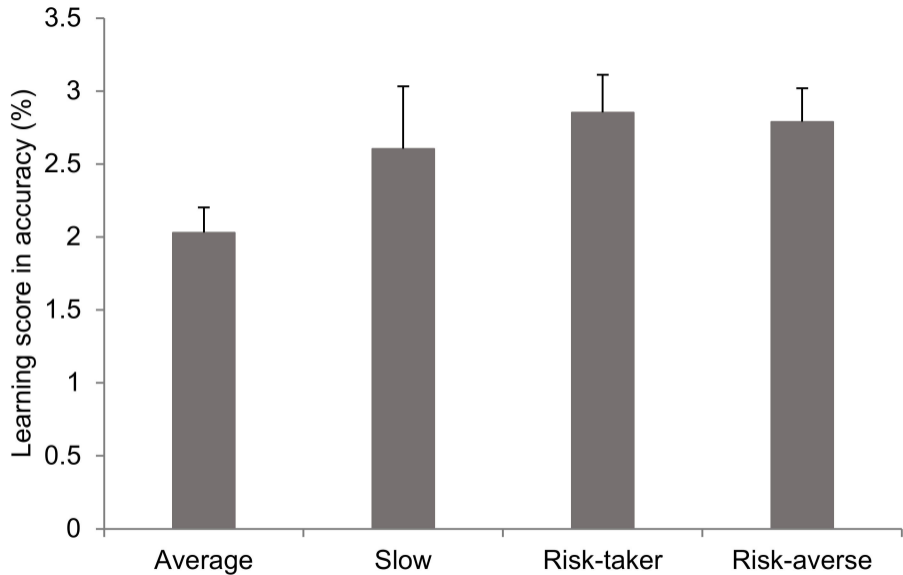

Source: https://www.biorxiv.org/content/10.1101/158253v1.full.pdf
